# Supplementary material for: Active Care Management Supported by Home Telemonitoring in Veterans With Type 2 Diabetes: The DiaTel randomized controlled trial
Source: PubMed Central journal article supplement — Diabetes Care. 2009 Dec 15;33(3):478–84. doi: 10.2337/dc09-1012 (PMC2827492; doi:10.2337/dc09-1012), 2009-12-15

**Appendix Table A1.** Baseline characteristics of participants in the Care Coordination (CC) and Active Care Management (ACM+HT) treatment groups.

| Characteristics                                      | CC (N=73) |      | ACM+HT (N=64) |       | P-value |
|------------------------------------------------------|-----------|------|---------------|-------|---------|
|                                                      | n         | %    | n             | %     |         |
| <b>Age group</b>                                     |           |      |               |       | 0.98    |
| <45 years                                            | 4         | 5.5  | 3             | 4.7   |         |
| 45-65 years                                          | 43        | 58.9 | 38            | 59.4  |         |
| >=65 years                                           | 26        | 35.6 | 23            | 35.9  |         |
| <b>Division/CBOC</b>                                 |           |      |               |       |         |
| University Drive                                     | 35        | 48.0 | 30            | 46.2  |         |
| Highland Drive                                       | 9         | 12.3 | 10            | 15.6  |         |
| Aspinwall                                            | 14        | 19.2 | 14            | 21.9  |         |
| AQ (CBOC)                                            | 2         | 2.7  | 2             | 3.1   |         |
| GB (CBOC)                                            | 3         | 4.1  | 2             | 3.1   |         |
| UN (CBOC)                                            | 3         | 4.1  | 0             | 0.0   |         |
| WA (CBOC)                                            | 2         | 2.7  | 1             | 1.6   |         |
| SC (CBOC)                                            | 5         | 6.9  | 5             | 7.8   |         |
| <b>Gender</b>                                        |           |      |               |       | 0.18    |
| Male                                                 | 71        | 97.3 | 64            | 100.0 |         |
| Female                                               | 2         | 2.7  | 0             | 0.0   |         |
| <b>Race</b>                                          |           |      |               |       | 0.24    |
| White, not of Hispanic origin                        | 59        | 80.8 | 46            | 71.9  |         |
| African-American or black, not of Hispanic origin    | 12        | 16.4 | 18            | 28.1  |         |
| Asian or Pacific Islander                            | 1         | 1.4  | 0             | 0.0   |         |
| American Indian or Alaskan Native                    | 1         | 1.4  | 0             | 0.0   |         |
| <b>Employment status</b>                             |           |      |               |       | 0.09    |
| Employed full-time ( $\geq 35$ hours/week)           | 18        | 24.7 | 5             | 7.8   |         |
| Employed part-time (<35 hours/week)                  | 8         | 11.0 | 8             | 12.5  |         |
| Homemaker, not working outside the home              | 1         | 1.4  | 2             | 3.1   |         |
| Retired                                              | 38        | 52.0 | 37            | 57.8  |         |
| Unemployed                                           | 8         | 11.0 | 12            | 18.8  |         |
| <b>Marital status</b>                                |           |      |               |       | 0.48    |
| Single, never married                                | 12        | 16.4 | 7             | 10.9  |         |
| Married, or living as married                        | 40        | 54.8 | 32            | 50.0  |         |
| Widowed                                              | 4         | 5.5  | 7             | 10.9  |         |
| Separated or divorced                                | 17        | 23.3 | 18            | 28.1  |         |
| <b>Living arrangement</b>                            |           |      |               |       | 0.21    |
| Private residence (house or apartment), living alone | 19        | 26.0 | 23            | 35.9  |         |
| Private residence, living with others                | 54        | 74.0 | 41            | 64.1  |         |
| <b>Education</b>                                     |           |      |               |       | 0.59    |
| Grade school (year 1 through 8) or less              | 2         | 2.7  | 2             | 3.1   |         |
| Some high school                                     | 6         | 8.2  | 5             | 7.8   |         |
| Completed high school or GED                         | 30        | 41.1 | 23            | 35.9  |         |
| Some college or association school                   | 12        | 16.4 | 19            | 29.7  |         |
| Completed technical or vocational school             | 13        | 17.8 | 8             | 12.5  |         |
| Completed college or more                            | 10        | 13.7 | 7             | 10.9  |         |
| <b>Comorbidities</b>                                 |           |      |               |       |         |
| Coronary artery disease                              | 24        | 32.9 | 25            | 39.1  | 0.45    |
| Congestive heart failure                             | 9         | 12.3 | 13            | 20.3  | 0.20    |
| Chronic obstructive pulmonary disease                | 6         | 8.2  | 4             | 6.3   | 0.66    |

**Appendix Table A2.** Number of participants on each type of medication at baseline, 3 and 6 months, by treatment group.

|                             | CC<br>N=73 |      | ACM+HT<br>N=64 |      | <i>P-value</i> |
|-----------------------------|------------|------|----------------|------|----------------|
|                             | n          | %    | n              | %    |                |
| <b>Baseline</b>             |            |      |                |      |                |
| Oral hypoglycemic agent     | 57         | 78.1 | 47             | 73.4 | 0.53           |
| Insulin                     | 40         | 54.8 | 39             | 60.9 | 0.47           |
| Antihypertensive medication | 66         | 90.4 | 56             | 87.5 | 0.59           |
| Lipid lowering medication   | 62         | 84.9 | 48             | 75.0 | 0.15           |
| <b>3-months</b>             |            |      |                |      |                |
| Oral hypoglycemic agent     | 56         | 76.7 | 45             | 70.3 | 0.40           |
| Insulin                     | 40         | 54.8 | 39             | 60.9 | 0.47           |
| Antihypertensive medication | 67         | 91.8 | 58             | 90.6 | 0.81           |
| Lipid lowering medication   | 63         | 86.3 | 52             | 81.3 | 0.42           |
| <b>6-months</b>             |            |      |                |      |                |
| Oral hypoglycemic agent     | 56         | 76.7 | 44             | 68.8 | 0.37           |
| Insulin                     | 42         | 57.5 | 43             | 67.2 | 0.25           |
| Antihypertensive medication | 68         | 93.2 | 58             | 90.6 | 0.59           |
| Lipid lowering medication   | 63         | 86.3 | 50             | 78.1 | 0.38           |

**Appendix Table A3.** Mean change scores over time within each treatment group ( $\text{Diff}_{\text{CC}}$  and  $\text{Diff}_{\text{ACM+HT}}$ ), between-group differences in time-specific change scores ( $\text{Diff}_{\text{ACM}} - \text{Diff}_{\text{CC}}$ ); 95% confidence intervals (95% CIs) for these between-group differences and corresponding P-values are shown for each pair of timepoints. A positive  $\text{Diff}_{\text{CC}}$  or  $\text{Diff}_{\text{ACM}}$  indicates that an outcome decreased over time within the group, while a negative difference indicates an increase. Statistically significant within-group differences over time are indicated by an asterisk (\*). A positive  $\text{Diff}_{\text{ACM}} - \text{Diff}_{\text{CC}}$  indicates that the decrease over time is larger in the ACM+HT group than in the CC group, while a negative value indicates either a smaller decrease or a larger increase over time in the ACM+HT group than in the CC group.

| Primary outcome              | Timepoints | CC (N=73)                 |       | ACM+HT (N=64)              |       | $\text{Diff}_{\text{ACM}} - \text{Diff}_{\text{CC}}$ |        |         |        |
|------------------------------|------------|---------------------------|-------|----------------------------|-------|------------------------------------------------------|--------|---------|--------|
|                              |            | $\text{Diff}_{\text{CC}}$ | SD    | $\text{Diff}_{\text{ACM}}$ | SD    | Mean†                                                | 95% CI | P-value |        |
| <b>HbA1c (%)</b>             | Base-3m    | 0.7*                      | 1.3   | 1.7*                       | 1.4   | 0.9                                                  | 0.5    | 1.4     | <0.001 |
|                              | Base-6m    | 0.8*                      | 1.4   | 1.7*                       | 1.5   | 0.9                                                  | 0.4    | 1.4     | <0.001 |
|                              | 3m-6m      | 0.1                       | 0.9   | 0.1                        | 0.9   | 0.0                                                  | -0.3   | 0.3     | 0.98   |
| <b>Weight (lbs)</b>          | Base-3m    | 1.5                       | 14.2  | 1.1                        | 10.8  | -0.4                                                 | -4.6   | 3.8     | 0.86   |
|                              | Base-6m    | -0.3                      | 11.0  | -2.9                       | 14.7  | -2.5                                                 | -6.8   | 1.7     | 0.24   |
|                              | 3m-6m      | -1.9                      | 10.1  | -4.0*                      | 12.4  | -2.2                                                 | -5.9   | 1.6     | 0.26   |
| <b>Systolic BP (mmHg)</b>    | Base-3m    | 5.1*                      | 20.1  | 8.9*                       | 20.8  | 3.8                                                  | -3.0   | 10.6    | 0.27   |
|                              | Base-6m    | 9.3*                      | 19.9  | 12.8*                      | 26.2  | 3.6                                                  | -4.1   | 11.3    | 0.36   |
|                              | 3m-6m      | 4.1                       | 21.3  | 3.9                        | 27.2  | -0.3                                                 | -8.5   | 8.0     | 0.95   |
| <b>Diastolic BP (mmHg)</b>   | Base-3m    | 3.9*                      | 11.4  | 4.6*                       | 12.5  | 0.7                                                  | -3.3   | 4.7     | 0.73   |
|                              | Base-6m    | 4.6*                      | 12.5  | 7.6*                       | 13.8  | 3.0                                                  | -1.4   | 7.3     | 0.18   |
|                              | 3m-6m      | 0.7                       | 12.0  | 3.0                        | 14.1  | 2.3                                                  | -2.2   | 6.7     | 0.30   |
| <b>Cholesterol (mg/dl)</b>   | Base-3m    | 14.8*                     | 39.6  | 27.5*                      | 42.4  | 12.7                                                 | -1.2   | 26.6    | 0.07   |
|                              | Base-6m    | 16.5*                     | 43.9  | 29.1*                      | 44.4  | 12.7                                                 | -2.2   | 27.5    | 0.09   |
|                              | 3m-6m      | 1.6                       | 27.9  | 1.6                        | 28.5  | 0.0                                                  | -9.9   | 9.8     | 1.00   |
| <b>HDL (mg/dl)</b>           | Base-3m    | 2.1*                      | 6.7   | 3.4*                       | 12.4  | 1.3                                                  | -2.0   | 4.6     | 0.45   |
|                              | Base-6m    | 2.0*                      | 6.5   | 3.3*                       | 9.9   | 1.3                                                  | -1.5   | 4.1     | 0.36   |
|                              | 3m-6m      | -0.1                      | 5.9   | -0.1                       | 8.2   | 0.0                                                  | -2.5   | 2.5     | 0.99   |
| <b>LDL†† (mg/dl)</b>         | Base-3m    | 9.5*                      | 29.9  | 12.5*                      | 33.4  | 3.0                                                  | -8.1   | 14.1    | 0.60   |
|                              | Base-6m    | 10.6*                     | 32.0  | 16.5*                      | 34.8  | 5.9                                                  | -5.9   | 17.7    | 0.33   |
|                              | 3m-6m      | 1.1                       | 27.8  | 4.0                        | 22.6  | 2.9                                                  | -6.0   | 11.7    | 0.52   |
| <b>Triglycerides (mg/dl)</b> | Base-3m    | 24.1                      | 126.8 | 41.4*                      | 114.5 | 17.3                                                 | -23.9  | 58.6    | 0.41   |
|                              | Base-6m    | 23.3                      | 111.7 | 38.9*                      | 113.6 | 15.6                                                 | -22.0  | 53.1    | 0.41   |
|                              | 3m-6m      | -0.8                      | 80.2  | -2.5                       | 87.5  | -1.8                                                 | -30.4  | 26.8    | 0.90   |

† Because measurements are rounded to one decimal place for reporting purposes, the rounded difference scores may differ slightly from the differences of the rounded means.

†† CC: N=69; ACM+HT: N=59

**Appendix Table A4.** The CONSORT Flowchart

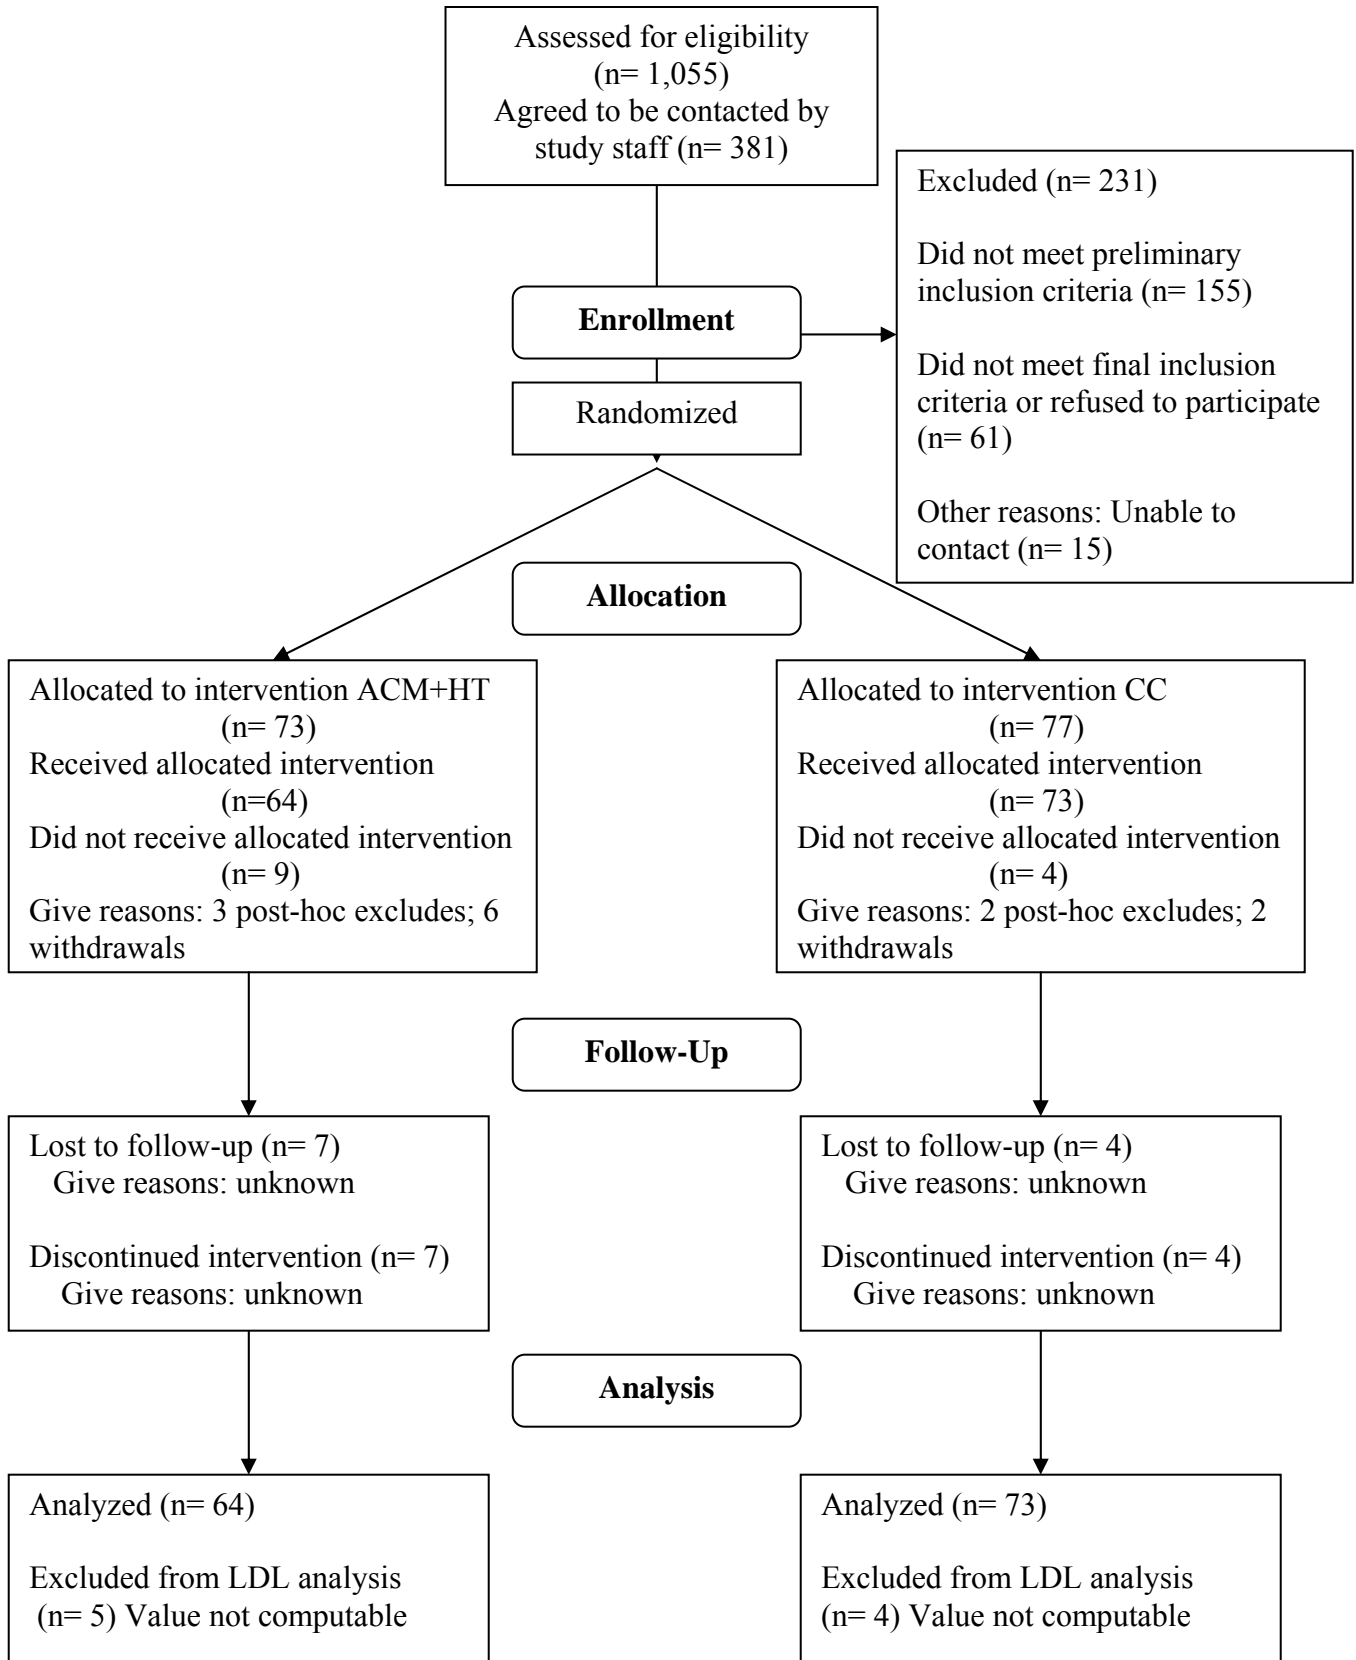

**Appendix Figure A1:** Dotplots of HbA1c at baseline, 3 and 6 months by treatment group for two subgroups: (a) participants who required insulin at baseline, and (b) participants who were taking only oral hypoglycemic agents at baseline. Black circles denote the ACM+HT group and open circles denote the CC group. Time-specific mean values are connected by solid black lines for the ACM+HT group and dotted lines for the CC group.

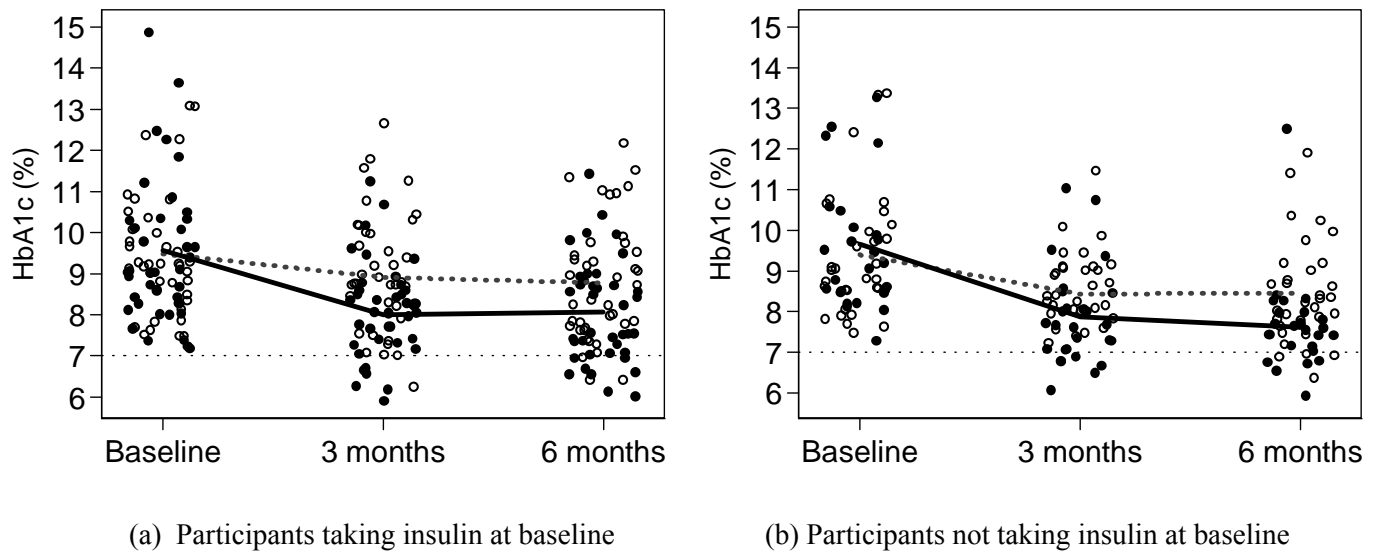

Supplement: supp_dc09-1012_dc09-1012_online_appendix.pdf [file supp_dc09-1012_dc09-1012_online_appendix.pdf]
